# Supplementary material for: Selective oxidation of CO in the presence of H2, H2O and CO2via gold for use in fuel cells
Source: Royal Society of Chemistry journal article supplement (doi:10.1039/b505295p), 2005-01-01
Supplement: b505295p.pdf [file b505295p.pdf]

**Electronic Supplementary Information****Materials and Methods**

**Preparation of supported gold catalysts.** Au/Fe<sub>2</sub>O<sub>3</sub> catalysts were prepared by co-precipitation using the following procedure. Dilute aqueous solutions of HAuCl<sub>4</sub>·3H<sub>2</sub>O (Strem, 99.9%) and Fe(NO<sub>3</sub>)<sub>3</sub>·9H<sub>2</sub>O (Aldrich, 99.999) which contained the calculated amounts of Au and Fe to give the desired loading on Fe<sub>2</sub>O<sub>3</sub> were mixed together with stirring at 80°C. Na<sub>2</sub>CO<sub>3</sub> (Aldrich, 0.25 mol l<sup>-1</sup>) was added dropwise until pH 8.2 was attained. The resulting precipitate was then recovered by filtration and washed with hot deionised water (80°C, 1 l). Using this method 5 wt% Au/Fe<sub>2</sub>O<sub>3</sub> was prepared and the material was either dried or calcined in air at a range of temperatures and times. Au and Au/Pd supported on Al<sub>2</sub>O<sub>3</sub> were also prepared by impregnation, as we have shown that these catalysts are effective for H<sub>2</sub> oxidation to selectively form H<sub>2</sub>O<sub>2</sub> (1, 2). Also 1 wt% Au/CeO<sub>2</sub> prepared by co-precipitation and 5 wt% Au/TiO<sub>2</sub> prepared by wet impregnation of TiO<sub>2</sub> (Degussa P25) with HAuCl<sub>4</sub>·3H<sub>2</sub>O (Strem, 99.9%) were investigated.

**Catalyst testing.** Catalysts (50 mg) were initially evaluated for CO oxidation in the presence of hydrogen using a fixed bed reactor (i.d. = 3 mm). CO (0.1 ml/min), H<sub>2</sub> (0.2 ml/min), O<sub>2</sub> (4 ml/min) and N<sub>2</sub> (20.7 ml/min), total gas hourly space velocity (GHSV) = 30000 h<sup>-1</sup> were fed to the reactor using mass flow controllers. The reactor effluent gases were analysed using on-line gas chromatography. Tests involving realistic fuel cell conditions have also been carried out. Based on published fuel cell system designs<sup>3</sup>, we have mimicked the output of an auto-thermal methanol reformer, generating a gas stream containing 1%CO 55% H<sub>2</sub>, 24%CO<sub>2</sub>, 5% H<sub>2</sub>O and 15% N<sub>2</sub>. To this stream air was added in order to oxidise the CO. Therefore our working conditions, replicating the conditions of the fuel cell environment, have been established as: 0.9%CO, 0.9%O<sub>2</sub>, 50%H<sub>2</sub>, 22%CO<sub>2</sub>, 4.7%H<sub>2</sub>O, with the balance being N<sub>2</sub>. The mass of catalyst used was 100 mg and the total flow rate 20 ml min<sup>-1</sup>, giving an hourly space velocity (GHSV) = 12000 h<sup>-1</sup>.

**XPS measurements.** Spectra were recorded with a VG ESCALAB 220 spectrometer utilising an achromatic AlK $\alpha$  source and an analyser pass energy of 20 eV.

**TEM measurements.** Samples of all catalysts were prepared for transmission electron microscopy examination by dispersing the catalyst powder in high purity ethanol. A drop of the suspension was then allowed to evaporate on a holey-carbon film supported by a 300 mesh copper TEM grid. Imaging experiments were carried out on a JEOL 2000FX TEM operating at 200 kV with a LaB<sub>6</sub> source.

**References**

1. M. J. Kahlich, H.A. Gasteiger, R. J. Behm, *J. Catal.* **182**, 430 (1999).
2. B. T. Qiao, Y. Q. Deng, *Chem. Commun.* 2192 (2003).
3. P. Mizsey, E. Newson, *J. Power Sources* **102**, 205 (2001).

## Supplementary Figures

**Supplementary Figure 1.** TEM of Au/Fe<sub>2</sub>O<sub>3</sub> samples. Key: **A** calcined at 400°C, 3 h, **B** calcined at 400 and 550°C, **C** calcined at 550°C, 3 h, **D** calcined at 600°C, 3 h.

**Supplementary Figure 2** Au(4f) X-ray photoelectron spectra for a series of Au/Fe<sub>2</sub>O<sub>3</sub> catalysts: (i) dried at 120 °C, (ii) calcined at 400 °C, (iii) calcined at 400 °C and 550 °C and (iv) calcined at 600 °C. Arrows indicate the presence of cationic gold in (ii) which is absent in (iii).

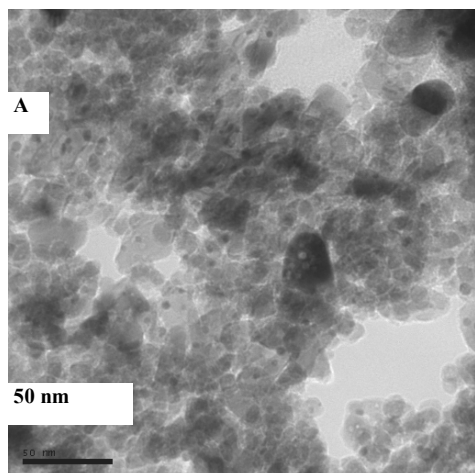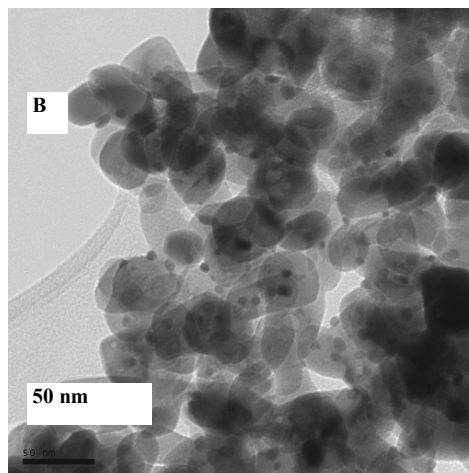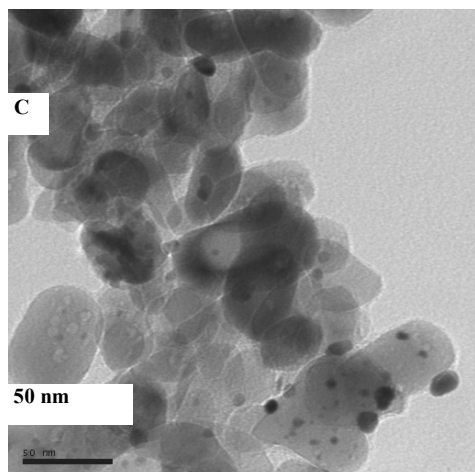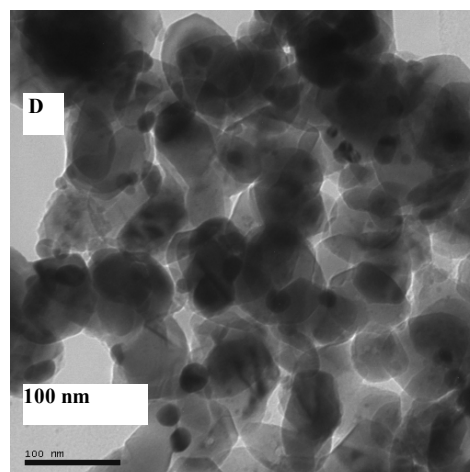

Supplementary Figure 1

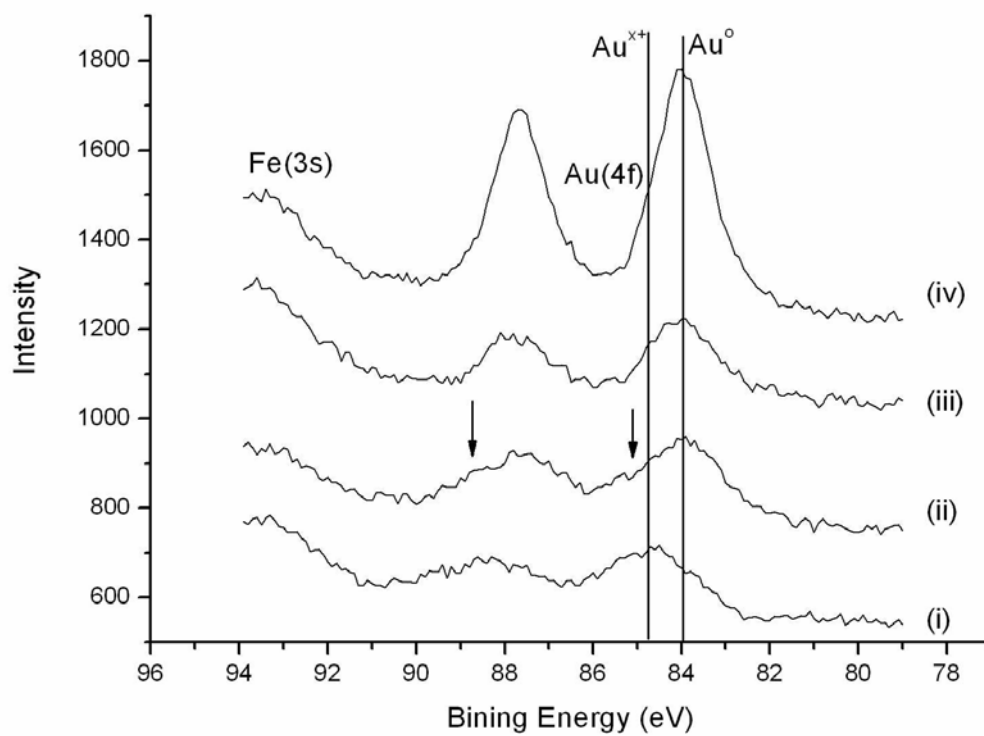

Supplementary Figure 2

**Supplementary Table 1** Catalysts for the selective oxidation of CO in the presence of H<sub>2</sub>

| Catalyst                                                           | Reaction mixture composition (%) |                |                |                  |                 |                               | Conv (%)        | Sel (%)       | T (°C)                    | GHSV (h <sup>-1</sup> ) | Ref. †    |
|--------------------------------------------------------------------|----------------------------------|----------------|----------------|------------------|-----------------|-------------------------------|-----------------|---------------|---------------------------|-------------------------|-----------|
|                                                                    | CO                               | O <sub>2</sub> | H <sub>2</sub> | H <sub>2</sub> O | CO <sub>2</sub> | Bal                           |                 |               |                           |                         |           |
| <b>Target</b>                                                      | <b>0.8-1.0</b>                   | <b>0.4-1.0</b> | <b>50</b>      | <b>2-10</b>      | <b>20-24</b>    | <b>Inert N<sub>2</sub> He</b> | <b>&gt;99.5</b> | <b>&gt;50</b> | <b>80-110<sup>§</sup></b> | -                       |           |
| Au/Fe <sub>2</sub> O <sub>3</sub> (400+550°C)                      | 0.9                              | 0.9            | 50             | 4.7              | 22              | He                            | 99.8            | 51            | 80                        | 12000                   | This work |
| Au/Fe <sub>2</sub> O <sub>3</sub> (120°C)                          | 0.9                              | 0.9            | 50             | 4.7              | 22              | He                            | <b>92</b>       | <b>47</b>     | 80                        | 12000                   | This work |
| Au/CeO <sub>2</sub> (120°C)                                        | 0.9                              | 0.9            | 50             | 4.7              | 22              | He                            | <b>68</b>       | <b>35</b>     | 80                        | 12000                   | This work |
| CuO-CeO <sub>2</sub> (urea DP)                                     | 1                                | 1              | 50             | 10               | 20              | He                            | ~0              | -             | 80                        | 10000                   | 18        |
| CuO-CeO <sub>2</sub> (urea DP)                                     | 1                                | 1              | 50             | 10               | 20              | He                            | 99              | 65            | <b>165</b>                | 10000                   | 18        |
| CuO-CeO <sub>2</sub> (CP)                                          | 1                                | 1.25           | 50             | 10               | 15              | He                            | 99              | 63            | <b>170</b>                | 10000                   | 21        |
| Supported Pt/Al <sub>2</sub> O <sub>3</sub> -                      | <b>0.1</b>                       | <b>0.05</b>    | <b>20</b>      | <b>0</b>         | <b>0</b>        | N <sub>2</sub>                | <b>75</b>       | 80            | 90                        | 120000                  | 22        |
| Au/CeO <sub>2</sub>                                                | 1                                | <b>1.5</b>     | <b>48</b>      | 0                | 24              | He                            | <b>20</b>       | <b>20</b>     | 80                        | 110000                  | 23        |
| Au/Fe <sub>2</sub> O <sub>3</sub> (400°C)                          | <b>0.1</b>                       | <b>0.1</b>     | 66             | 10               | 22              | -                             | *               | <b>29</b>     | 80                        | **                      | 20        |
| Au/Fe <sub>2</sub> O <sub>3</sub> (120°C)                          | 1                                | <b>4</b>       | 50             | <b>0</b>         | <b>0</b>        | He                            | 100             | 100           | 50                        | 20000                   | 11        |
| Au/CeO <sub>2</sub> (120°C)                                        | 0.8                              | 0.4            | 58.4           | <b>0</b>         | <b>0</b>        | -                             | <b>60</b>       | 99.7          | 60                        | 165000                  | 13        |
| Au/Fe <sub>2</sub> O <sub>3</sub> (400°C)                          | 1                                | <b>1.25</b>    | 50             | 10               | <b>15</b>       | -                             | <b>65</b>       | 60            | 80                        | 25000                   | 19        |
| Au/Fe <sub>2</sub> O <sub>3</sub> (400°C)                          | 1                                | <b>1.25</b>    | 50             | 10               | <b>15</b>       | -                             | 99.5            | 54.5          | 100                       | 25000                   | 19        |
| Au-Co/CeO <sub>2</sub> /TiO <sub>2</sub> /SnO <sub>2</sub> (400°C) | 0.5                              | 0.8            | <b>2</b>       | <b>0</b>         | <b>0</b>        | N <sub>2</sub>                | <b>76</b>       | 85            | 80                        | **                      | 12        |
|                                                                    | 0.5                              | 0.8            | <b>2</b>       | <b>0</b>         | <b>0</b>        | N <sub>2</sub>                | 91              | 91            | 100                       | **                      | 12        |
| Au/CeO <sub>2</sub> (500°C)                                        | 1                                | 1              | <b>40</b>      | 10               | <b>2</b>        | He                            | <b>76</b>       | 62            | 90                        | 30000                   | 24        |
| Au/CeO <sub>2</sub> (500°C)                                        | 1                                | 1              | <b>40</b>      | 10               | <b>2</b>        | He                            | <b>18</b>       | 56            | 90                        | 30000                   | 24        |

\* activity quoted as 0.003 mol CO/(g Au.s) \*\* not indicated § most PEFCs currently run at 80 °C

Figures in **bold italics** show where target conditions or target conversion/selectivity are not achieved.

† Additional references:

21. G. Avgouropoulos, T. Ioannides, H.K. Matralis, J. Batista and S. Hocevar, *Catal. Lett.* 201, **73**, 33.
22. O. Korotkikh, R. Farrauto. *Catalysis Today* 2000, **62**, 249.
23. G. Panzera *et al.*, *J. Power Sources* 2004, **135**, 177.
24. Luengnaruemitchai, S. Osuwan, E. Gulari, *Int. J. Hydrogen Energy* 2004, **29**, 429.

**Supplementary Table 2** Competitive oxidation of CO in the presence of H<sub>2</sub><sup>a</sup>

| Catalyst (calcination conditions)                                    | CO conversion (%)                    |    |    |    | H <sub>2</sub> conv. (%) |    |    |
|----------------------------------------------------------------------|--------------------------------------|----|----|----|--------------------------|----|----|
|                                                                      | <i>No H<sub>2</sub></i> <sup>b</sup> | 27 | 50 | 73 | 27                       | 50 | 73 |
|                                                                      | 27°C                                 | °C | °C | °C | °C                       | °C | °C |
| 5 wt% Au/Al <sub>2</sub> O <sub>3</sub><br>(400°C, 3 h)              | -                                    | 0  | 0  | 0  | 0                        | 0  | 0  |
| 2.5 wt% Au/2.5 wt% Pd/Al <sub>2</sub> O <sub>3</sub><br>(400°C, 3 h) | -                                    | 0  | 0  | 0  | 0                        | 0  | 19 |
| 5 wt% Pd/Al <sub>2</sub> O <sub>3</sub><br>(400°C, 3 h)              | -                                    | 0  | 0  | 0  | 0                        | 3  | 30 |
| 5 wt% Au/TiO <sub>2</sub><br>(400°C, 3 h)                            | -                                    | 0  | 0  | 0  | 0                        | 0  | 0  |
| 1 wt% Au/CeO <sub>2</sub><br>(400°C, 3 h)                            | -                                    | 30 | 59 | 80 | 0                        | 0  | 20 |

<sup>a</sup> 0.4 vol % CO, 0.8 vol % H<sub>2</sub>, 16 vol % O<sub>2</sub>, 50 mg catalyst, GHSV = 30 000 h<sup>-1</sup><sup>b</sup> 0.5% CO in air, 50 mg catalyst; GHSV = 24 000 h<sup>-1</sup>
